# Supplementary material for: A Grand Canonical Monte Carlo Simulation for the Evaluation of Pore Size Distribution of Nuclear-Grade Graphite from Kr Adsorption Isotherms
Source: MDPI journal article supplement (doi:10.3390/c9030086), 2023-09-04
Supplement: s1 [file s1]

**A Grand Canonical Monte Carlo simulation for  
the evaluation of pore size distribution of  
nuclear-grade graphite from Kr adsorption  
isotherms.**

**Supplementary information.**

Giuliano M. Laudone\* and Katie L. Jones

*Faculty of Science and Engineering, University of Plymouth, Plymouth, UK*

E-mail: [glaudone@plymouth.ac.uk](mailto:glaudone@plymouth.ac.uk)

# Materials

**Table SI1: Density and porosity data for IG110 and IG430 graphites.**

| Grade | Coke   | Coke<br>particle<br>size<br>$\mu\text{m}$ | Bulk<br>density<br>$\text{g cm}^{-3}$ | Apparent<br>skeletal<br>density<br>$\text{g cm}^{-3}$ | Accessible<br>porosity<br>% | Total<br>porosity<br>% |
|-------|--------|-------------------------------------------|---------------------------------------|-------------------------------------------------------|-----------------------------|------------------------|
| IG110 | Petrol | 10                                        | 1.77                                  | 2.06                                                  | 12.61                       | 20.36                  |
| IG430 | Pitch  | 10                                        | 1.82                                  | 2.10                                                  | 13.31                       | 19.62                  |

# Scanning Electron Micrographs

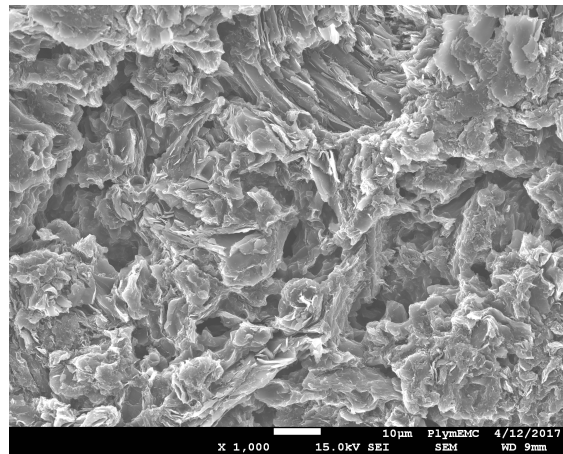

(a)

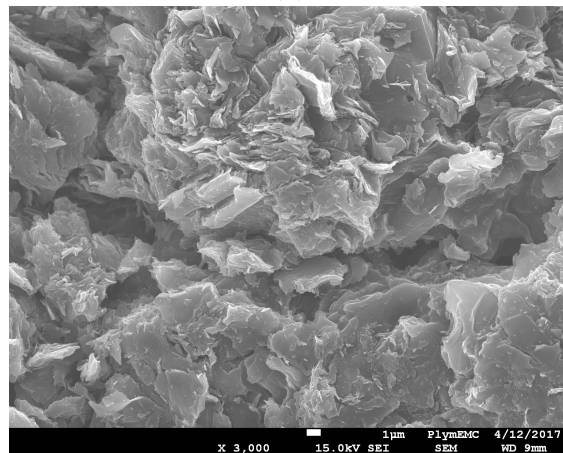

(b)

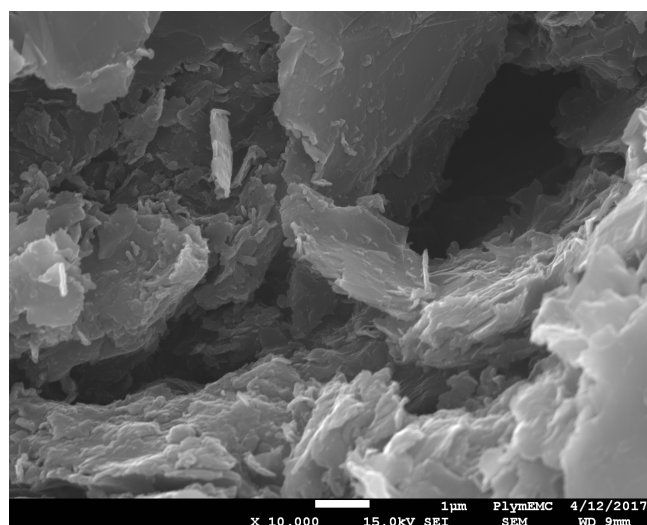

(c)

Figure SI1: Scanning electron micrographs of IG110 at different magnifications.

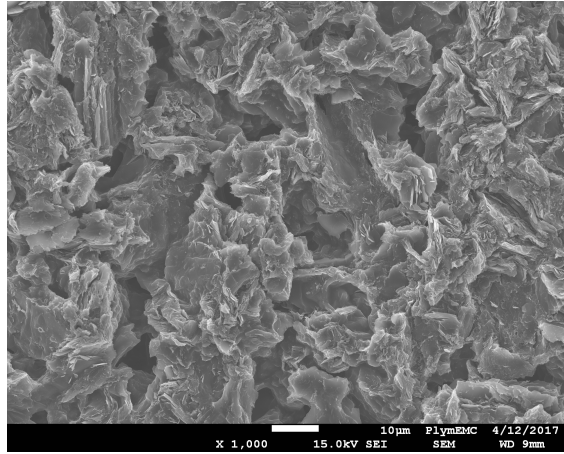

(a)

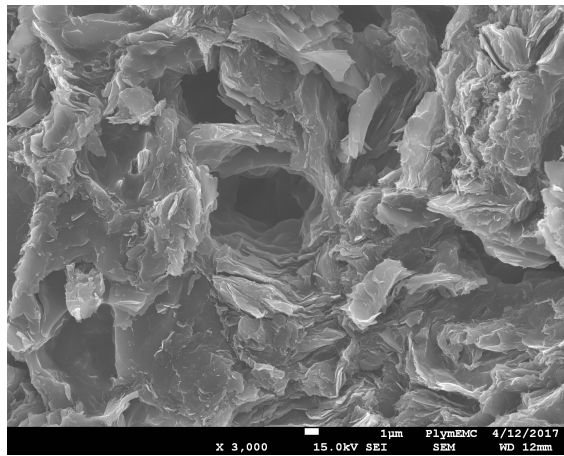

(b)

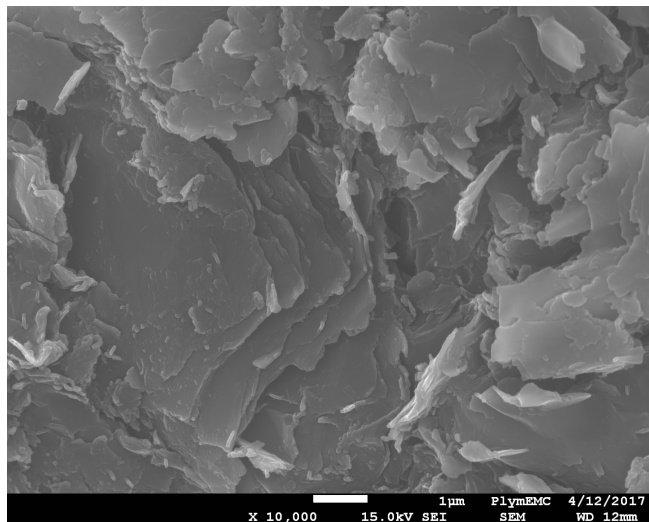

(c)

Figure SI2: Scanning electron micrographs of IG430 at different magnifications.

# Adsorption isotherms

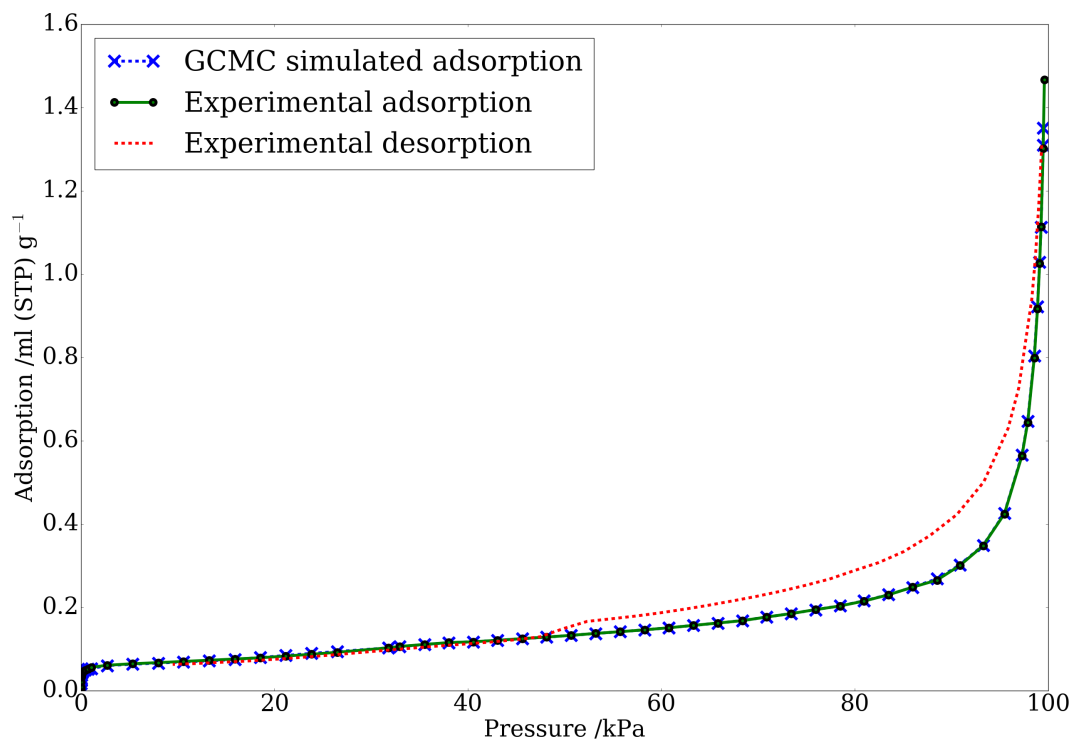

Figure SI3: Experimental and simulated  $\text{N}_2$  adsorption/desorption isotherms for IG110 graphite.

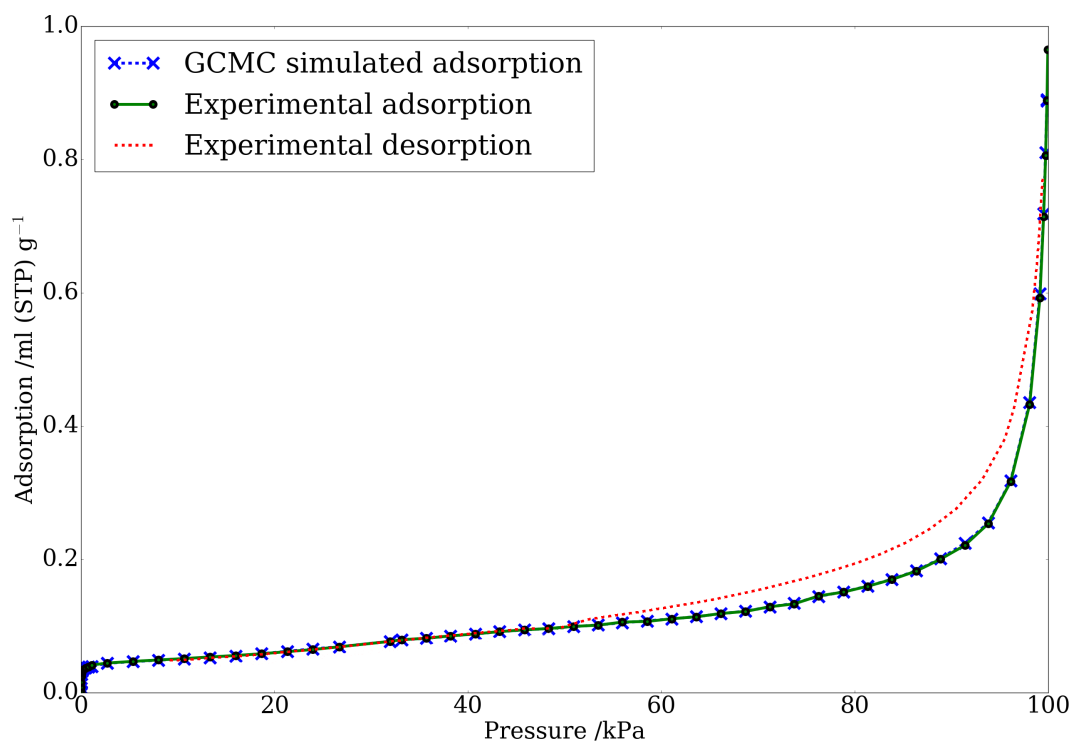

Figure SI4: Experimental and simulated N<sub>2</sub> adsorption/desorption isotherms for IG430 graphite.

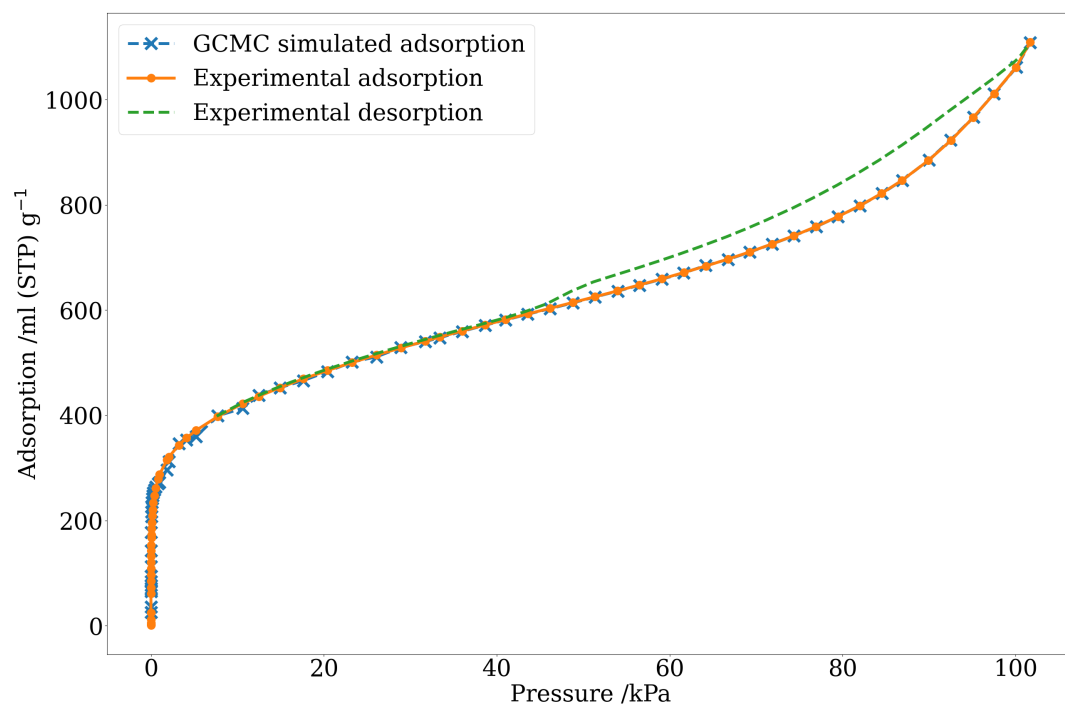

Figure SI5: Experimental and simulated N<sub>2</sub> adsorption/desorption isotherms for activated carbon.
